# Supplementary material
Source: PubMed Central journal article supplement (PMC4824852)
Supplement: 10.1074_M115.055954_mcp.M115.055954-2.pdf [file 10.1074_M115.055954_mcp.M115.055954-2.pdf]

**TABLE S2.** Protein domains that are represented more than once among the candidate ceramide-binding protein fragments. Domain accession numbers are in parentheses. Protein names that are shaded gray represent genes that meet the FPKM cutoffs in both the bead-enriched and FACS-enriched analyzed deep sequencing data. Italicized protein names indicate validated ceramide binding.

|                             |                                       |                                       |                                          |
|-----------------------------|---------------------------------------|---------------------------------------|------------------------------------------|
| <b><u>EFh (c108302)</u></b> | <b><u>PH (c117171)</u></b>            | <b><u>TPR (c122897)</u></b>           | <b><u>SAM (c115755)</u></b>              |
| ACTN1                       | ACAP3                                 | <i>SGTA</i>                           | ELF3                                     |
| ACTN4                       | CYTH1                                 | ST13P4                                | ZCCHC14                                  |
| C17orf57                    | CYTH2                                 | TTC8                                  |                                          |
| <i>CABP1</i>                | DAB2                                  |                                       | <b><u>PAH (c107842)</u></b>              |
| CALB2                       | PDPK1                                 | <b><u>SCP2 (c101225)</u></b>          | <i>SIN3A</i>                             |
| CALM1                       | PLEK2                                 | HSDL2                                 | SIN3B                                    |
| CALM2                       | PLEKHA1                               | SCP2                                  |                                          |
| <i>CALM3</i>                | SBF1                                  | <i>HSD17B4</i>                        | <b><u>Annexin (c102574)</u></b>          |
| CALML3                      |                                       |                                       | ANXA1                                    |
| CALN1                       | <b><u>STII (SM00727, c117974)</u></b> | <b><u>DnaJ (c102542)</u></b>          | ANXA6                                    |
| CETN1                       | <i>RAD23A</i>                         | DNAJC4                                |                                          |
| CETN2                       | <i>ST13</i>                           | DNAJB12                               | <b><u>Thioredoxin-like (c100388)</u></b> |
| CETN3                       | ST13P4                                | DNAJB9                                | <i>GDAP1L1</i>                           |
| <i>CHP</i>                  | UBQLN1                                |                                       | <i>PDIA6</i>                             |
| <i>EFCAB6</i>               | <i>UBQLN2</i>                         | <b><u>P-loop-NTPase (c121455)</u></b> |                                          |
| CIB1                        | <i>UBQLN4</i>                         | RSG1                                  | <b><u>UBCc (c100154)</u></b>             |
| <i>HPCA</i>                 |                                       | RAB11A                                | CDC34                                    |
| <i>HPCAL1</i>               | <b><u>UBQ (c100155)</u></b>           | GTPBP8                                | UBE2J2                                   |
| HPCAL4                      | MAP1LC3B2                             |                                       |                                          |
| KCNIP3                      | MYO9A                                 | <b><u>Lipocalin (c121528)</u></b>     | <b><u>H2A (c10007)</u></b>               |
| MYL12A                      | RAD23B                                | <i>PTGDS</i>                          | HIST2H3D                                 |
| <i>MYL6B</i>                | UBL4A                                 | RBP1                                  | HIST1H2APS1                              |
| MYL9                        | UBQLN1                                |                                       |                                          |
| NCALD                       | <i>UBQLN2</i>                         | <b><u>UBA-like (c121463)</u></b>      | <b><u>CAP-ED (c100047)</u></b>           |
| <i>NCS1</i>                 |                                       | <i>RAD23A</i>                         | PRKAR1A                                  |
| PDCD6                       | <b><u>Homeodomain (c100084)</u></b>   | RAD23B                                | PRKAR1B                                  |
| <i>PPEF1</i>                | HOXA5                                 |                                       |                                          |
| PPP3R2                      | HOXB5                                 | <b><u>XPC-binding (c118177)</u></b>   | <b><u>Albumin (c100031)</u></b>          |
| S100A11                     | HOXC4                                 | <i>RAD23A</i>                         | AFP                                      |
| TNNC1                       | HOXD9                                 | RAD23B                                | ALB                                      |
